# Supplementary material for: Differential effect of HLA class-I versus class-II transgenes on human T and B cell reconstitution and function in NRG mice
Source: Springer Nature journal article supplement (doi:10.1038/srep28093), 2016-06-21
Supplement: 41598_2016_BFsrep28093_MOESM97_ESM.pdf [file 41598_2016_BFsrep28093_MOESM97_ESM.pdf]

Title: Differential effect of HLA class-I *versus* class-II transgenes on human T and B cell reconstitution and function in NRG mice

Authors: Sai Majji, Wathsala Wijayalath, Soumya Shashikumar, Luis Pow-Sang, Eileen Villasante, Teodor D. Brumeanu and Sofia Casares

Supplementary Table S1.HLA genotype of cord bloods used for reconstitution of mice

| Cord blood* | HLA-A          | HLA-DRB1           | Number of infused mice |    |      |     |
|-------------|----------------|--------------------|------------------------|----|------|-----|
|             |                |                    | DRAGA                  | A2 | DRAG | NRG |
| Donor #1    | 02:01<br>33:01 | 04:0101<br>15:01   | 11                     | 6  | 9    | 2   |
| Donor #2    | 02:01<br>01:01 | 04:0101<br>04:04   | 11                     | 3  | 13   | 0   |
| Donor #3    | 02:01<br>29:01 | 04:0101<br>03:01   | 9                      | 9  | 13   | 2   |
| Donor #4    | 02:01<br>29:01 | 04:0101<br>13:0501 | 8                      | 5  | 0    | 0   |
| Donor #5    | 02:01<br>03:01 | 04:0101<br>08:01   | 0                      | 2  | 0    | 0   |
| Donor #6    | 02:01<br>01:01 | 04:0101<br>11:0102 | 4                      | 5  | 0    | 0   |
| Donor #7    | 02:01<br>01:03 | 04:0101<br>15:0101 | 4                      | 0  | 8    | 3   |

DRAGA, NOD.HLA-A2.HLA-DR4.RagKO.IL2R $\gamma$ cKO; DRAG, NOD.HLA-DR4.RagKO.IL2R $\gamma$ cKO; A2, NOD.HLA-A2.RagKO.IL2R $\gamma$ cKO, NRG, NOD.RagKO.IL2R $\gamma$ cKO.
